# Supplementary material for: Low-temperature solvothermal synthesis of nanocrystalline indium nitride and Ga–In–N composites from the decomposition of metal azides
Source: Royal Society of Chemistry journal article supplement (doi:10.1039/b608204a), 2006-01-01

Electronic Supporting Information for *J. Mater. Chem.* article by J. Choi and E. G. Gillan  
entitled “Low-temperature solvothermal synthesis of nanocrystalline indium nitride and Ga-In-N  
composites from the decomposition of metal azides”.

**Figure S1.** SEM of benchtop hexadecane reaction of  $\text{InBr}_3 + 3 \text{NaN}_3$  at 275 °C.

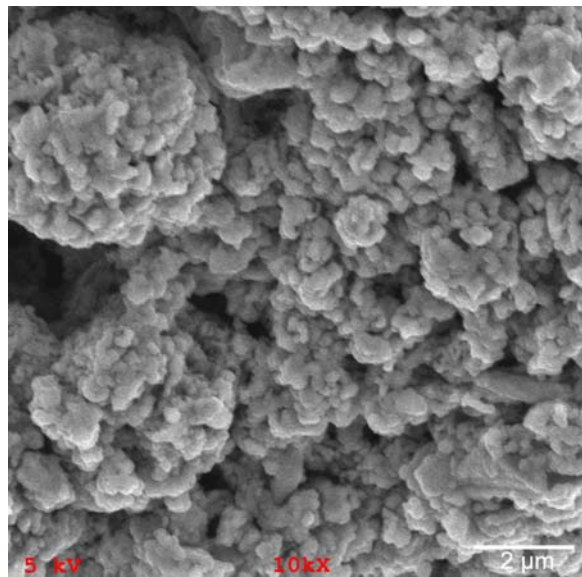

**Figure S2.** TEM of benchtop hexadecane reaction showing sheet-like aggregation.  
(scale bar = 50 nm)

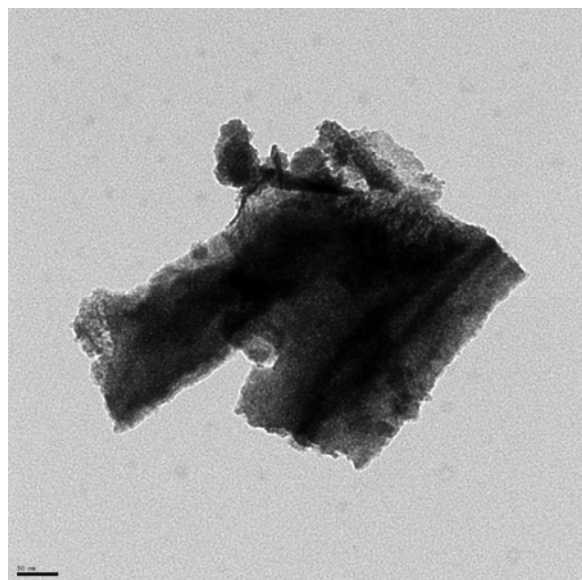

**Figure S3.** XRD of  $\text{Ga}_{0.5}\text{In}_{0.5}\text{N}$  composite synthesized at 250 °C in toluene (top curve) and after inert annealing a loose powder at 1000 °C for 3 hrs (bottom curve).

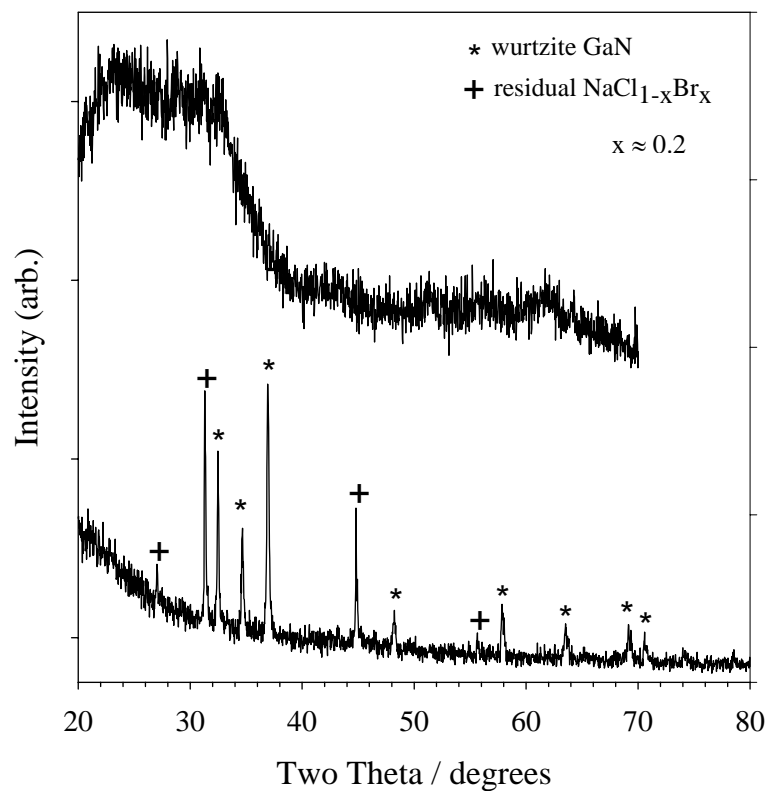

**Figure S4.** Solid UV-vis of InN powder from toluene reaction at 280 °C.

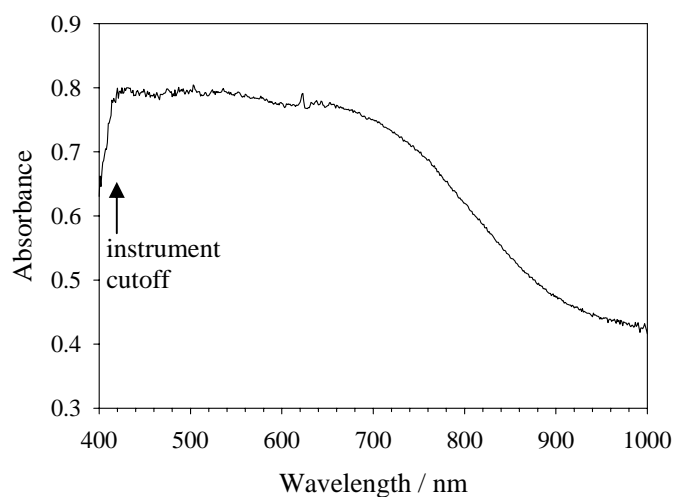

Supplement: b608204a.pdf [file b608204a.pdf]
